# Supplementary material for: Synergistic effects of the sesquiterpene lactone, EPD, with cisplatin and paclitaxel in ovarian cancer cells
Source: PubMed Central journal article supplement (PMC4472250; doi:10.1186/s13046-015-0157-2), 2015-04-25
Supplement: 13046_2015_157_MOESM1_ESM.pdf [file 13046_2015_157_MOESM1_ESM.pdf]

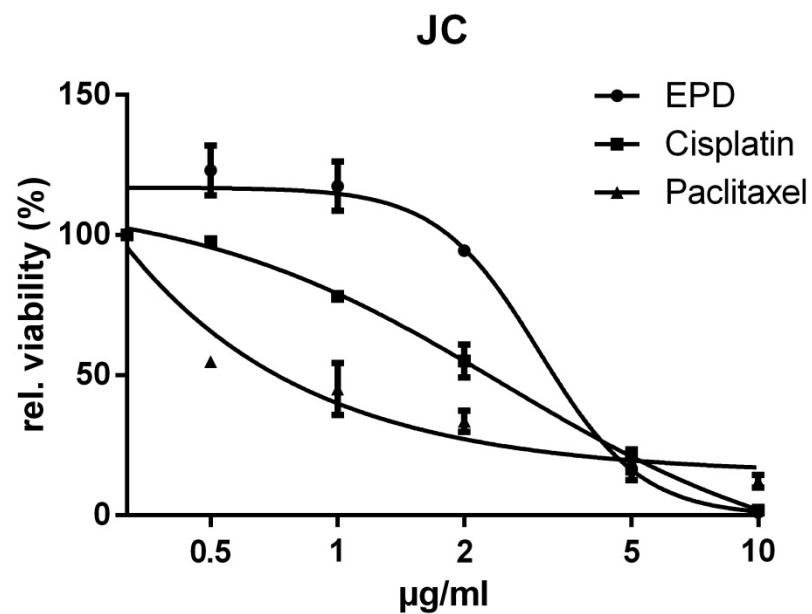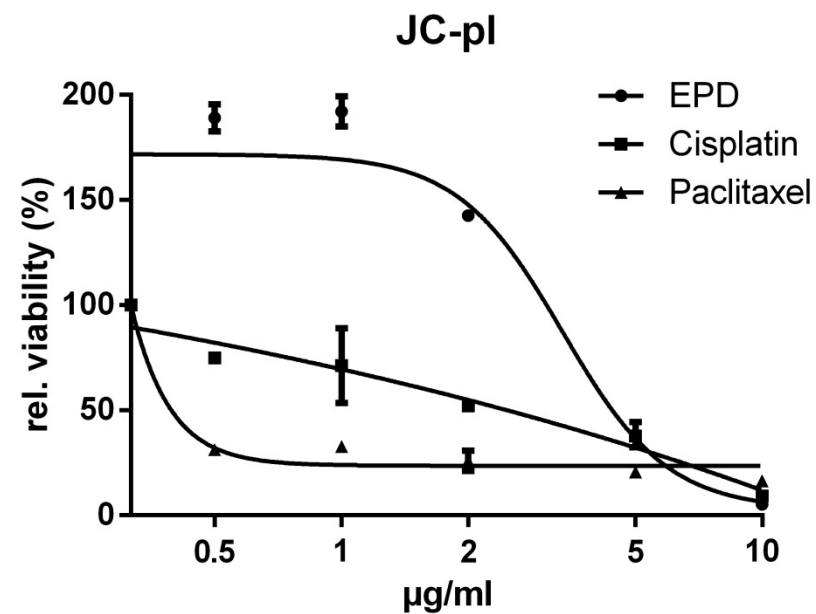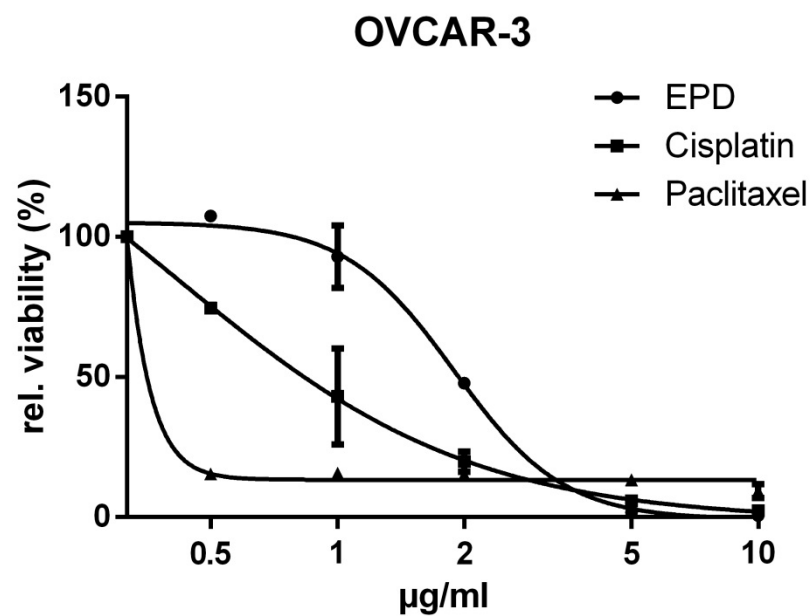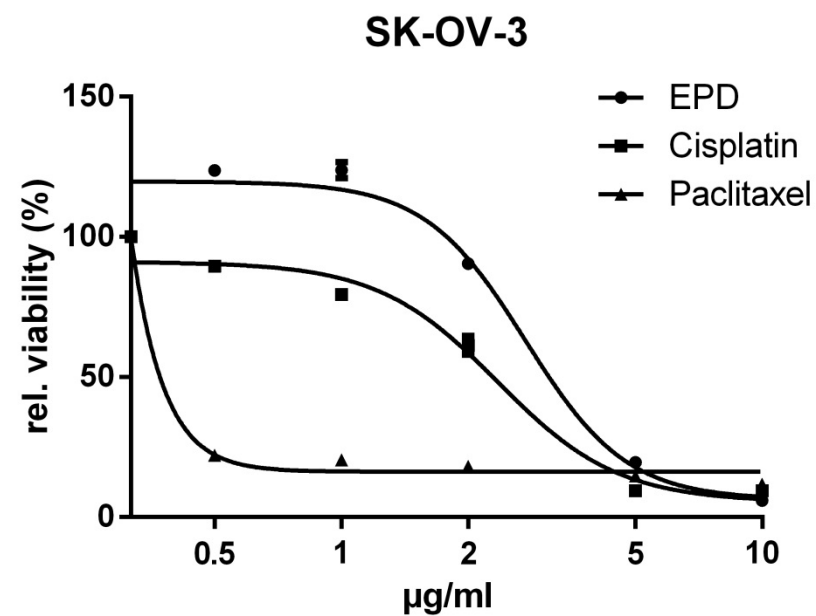

**Supplemental Figure 1**

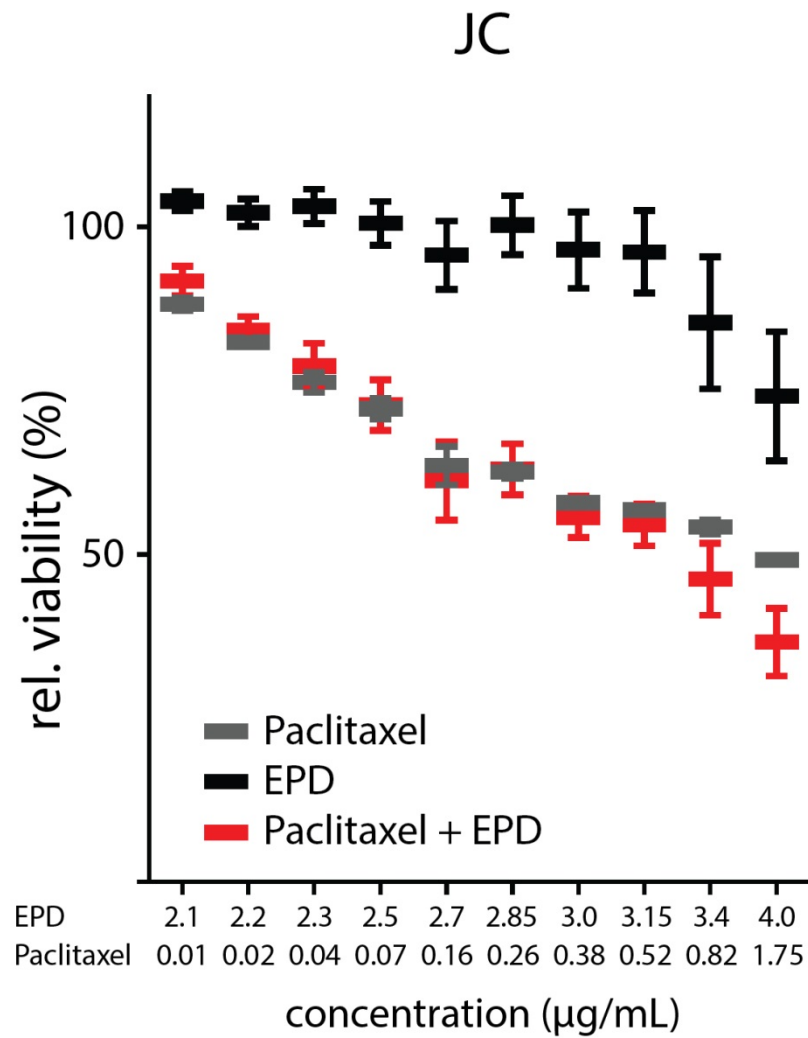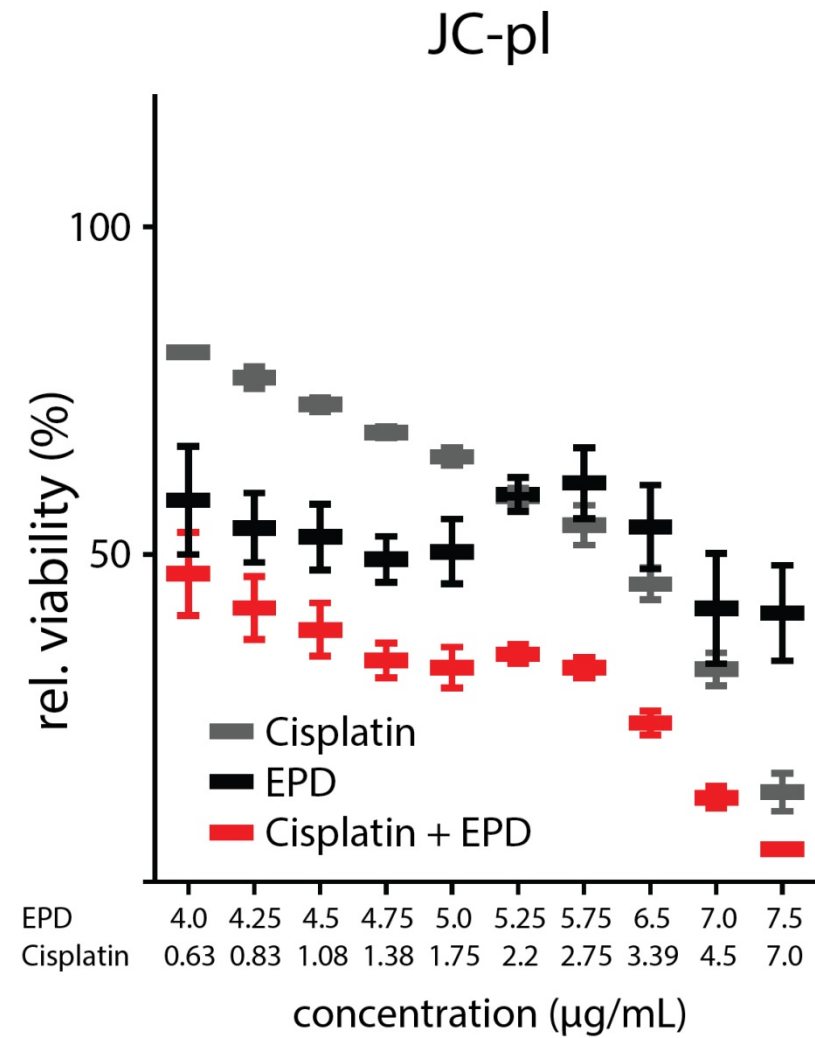

**Supplemental Figure 2**

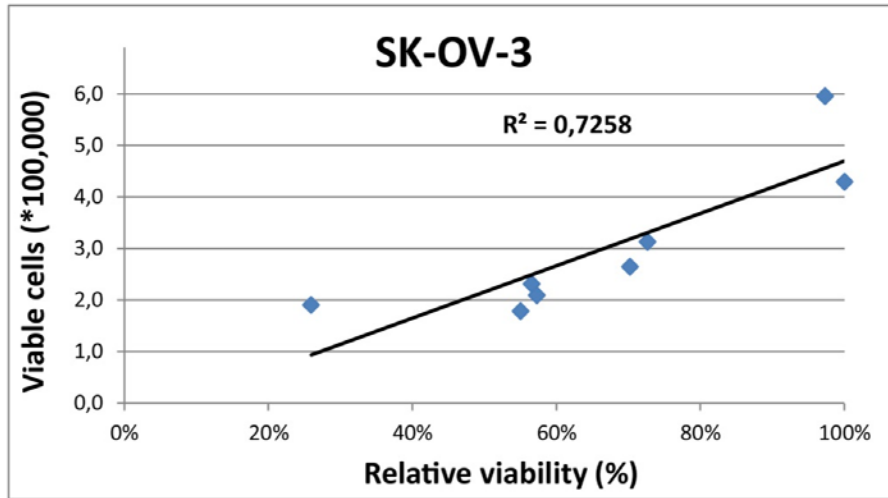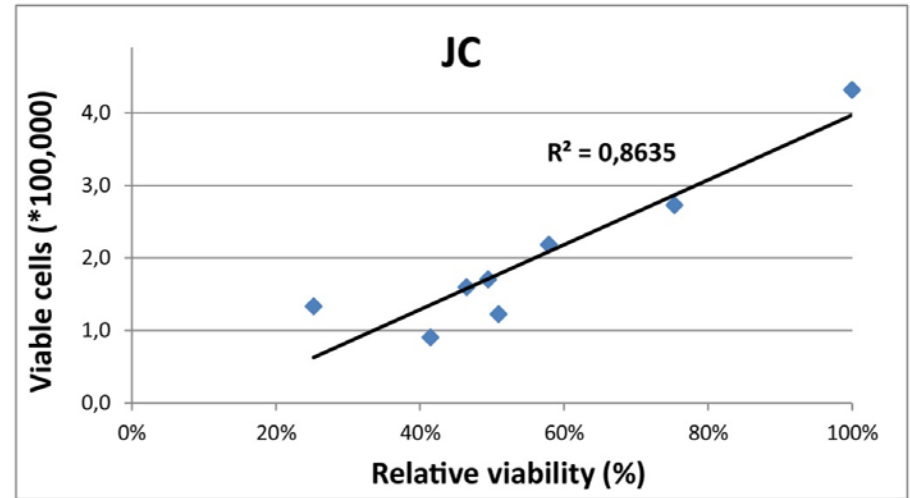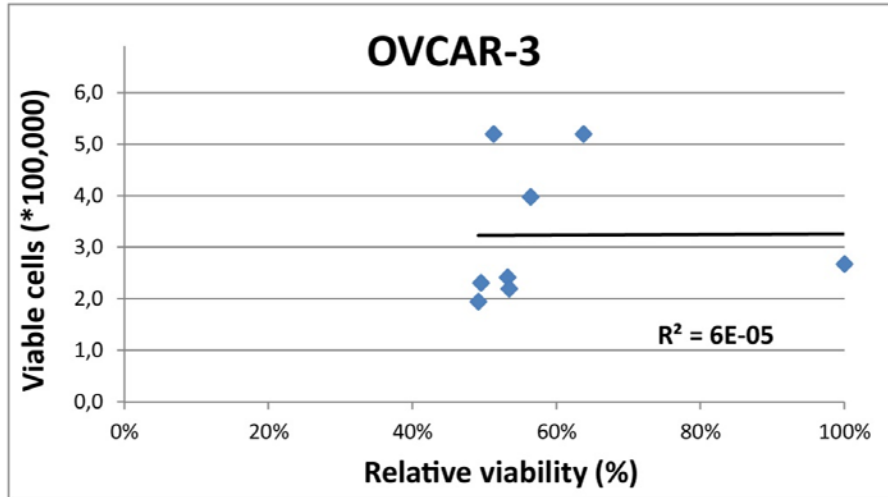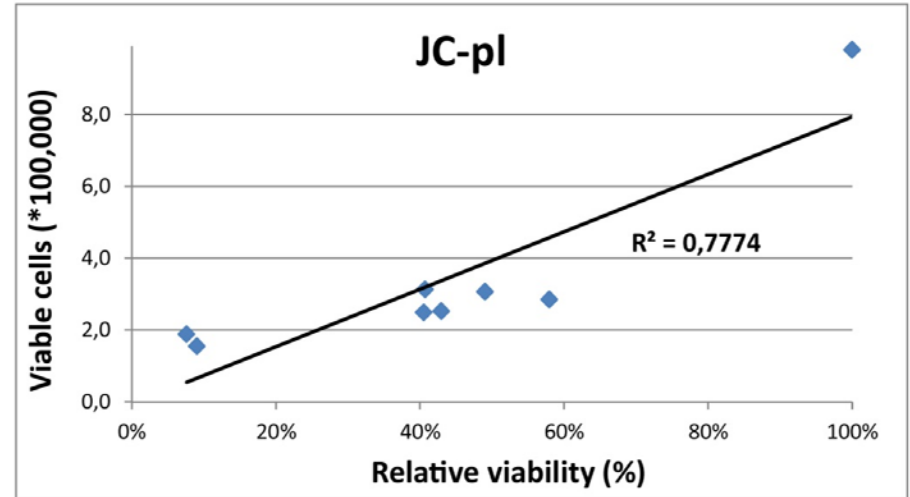

**Supplemental Figure 3**
